# Supplementary material for: A metabolic trade-off between phosphate and glucose utilization in Escherichia coli
Source: Royal Society of Chemistry journal article supplement (doi:10.1039/c4mb00313f), 2014-08-11
Supplement: c4mb00313f1.pdf [file c4mb00313f1.pdf]

## Supplementary files for:

# A metabolic trade-off between phosphate and glucose utilization in *Escherichia coli*

**Volker Behrends<sup>1^^\*</sup>, Ram P. Maharjan<sup>2^^</sup>, Ben Ryal<sup>2</sup>, Lu Feng<sup>3,4</sup>, Bin Liu<sup>3,4</sup>, Lei Wang<sup>3,4</sup>, Jacob G. Bundy<sup>1</sup> and Thomas Ferenci<sup>2\*</sup>**

<sup>1</sup> Computational and Systems Medicine, Imperial College London, London SW7 2AZ, UK

<sup>2</sup> School of Molecular Bioscience, University of Sydney, NSW 2006, Australia

<sup>3</sup>TEDA Institute of Biological Sciences and Biotechnology, Nankai University, 23 Hongda Street, Tianjin 300457, P.R. China

<sup>4</sup>Key Laboratory of Molecular Microbiology and Technology, Ministry of Education, 23 Hongda Street, Tianjin 300457, P. R. China

## **Materials and Methods**

### **Bacterial strains and growth media**

The bacterial strains used in this study are described in Table S3. Strains BW6041 and BW6043 were obtained by streaking a day 19 sample on Luria-agar plates and randomly picking colonies. The insertion Tn10 conferring tetracycline resistance in *sucC* and *kanR* genes was accomplished by using the method described previously in Yu *et al.* (2000). Briefly, using primer sets with flanking *sucC* and *kanR* target sequences, linear Tn10 DNA were synthesized by PCR from BW3345 and recombine into DY330 after electroporation. For the construction of *sucC:Tn10*, the primer set used was *sucCtetF1*(5'-GCACCG GTGGGTTATGCCTGTACTACTCCGACTCGACATCTTGGTTACCG-3') and *sucCtetR1* (5'-GCCGCTGTCAGCCAGTTTCTTCGCGCCGAGCAAGAGGGTCATTATATTTCG-3') and for construction of *kanR::Tn10*, the primer set used was *kanTetF1* (5'-GGA TTATCA ATACCATATTTTTGAAAAAGCCGCAAGAGGGTCATTATATTTCG-3') and *kanTetR1* (5'-GAGGCCGCGATTAAATTCCAACATGGATGCTGACTCGACATCTTGGTTACCG-3'). The mutated genes were then transferred into appropriate recipients by P1 phage transductions.

All phosphate limited (Pi-limited) bacterial cultures used T-salts minimal medium supplemented with D-glucose (0.2% w/v) and 35  $\mu\text{M}$   $\text{KH}_2\text{PO}_4$  for chemostats and 1 mM  $\text{KH}_2\text{PO}_4$  for batch cultures. For glucose limitation, Minimal Medium A (MMA) was supplemented with 0.02% w/v D-glucose for chemostats and 0.2% w/v for batch cultures.

For long-term chemostats, *E. coli* strain BW2952 was grown for 8 h in T-salts medium supplemented with 1 mM  $\text{KH}_2\text{PO}_4$  and 0.2% w/v D-glucose and inoculated (1 mL) into 80-mL chemostats containing T-salts medium, 35  $\mu\text{M}$   $\text{KH}_2\text{PO}_4$  and 0.2% D-glucose (Wang et al. 2010). The chemostat cultures were maintained at a dilution rate of 0.1 h for 32 days at 37 °C. Samples for NMR were collected directly every 2-3 days and filtered through a Millex-GP syringe filter unit with 0.22  $\mu\text{m}$  pore size.

### **Analysis of extracellular metabolites using Nuclear Magnetic Resonance (NMR) spectroscopy**

The 1.5 ml chemostat aliquots were freeze-dried and resuspended in 550  $\mu\text{l}$   $\text{D}_2\text{O}$  containing 1 mM sodium 3-trimethylsilyl-D<sub>4</sub>-propionate (TSP) and 5 mM sodium azide. The  $\text{D}_2\text{O}$  provided a frequency lock for the spectrometer and reduced the solvent signal, and the TSP served as an internal chemical shift reference ( $\delta = 0$ ). The spectra were acquired according to

a protocol modified from Beckonert *et al.* (2007) on a Bruker Avance DRX600 NMR spectrometer (Bruker BioSpin, Rheinstetten, Germany), with a magnetic field strength of 14.1 T ( $^1\text{H}$  resonance frequency 600 MHz) using a 5-mm inverse probe. A one-dimensional NOESY pulse sequence was used for water suppression and data were acquired into 64K data points over a spectral width of 12 kHz, with eight dummy scans and 128 scans per sample. Apodisation (0.5 Hz exponential function), Fourier transform, phase correction, and chemical shift referencing were carried out in iNMR 3 (Mestrelab). The data were then exported to Matlab for further analysis. Metabolite assignments were based on previous studies and an online database (Behrends *et al.* 2009, Ulrich *et al.* 2008).

### **Identification of a clone with an increased fermentative activity and genome re-sequencing**

Three independent clones were isolated from the day-19 glycerol stock sample after streaking on L-agar plates. The purified clones were then inoculated separately into Pi-limited chemostats. Samples were taken for excreted fermentation products by withdrawing 5 mL cultures, filtered through a Millex-GP syringe filter unit with 0.22  $\mu\text{m}$  pore size and stored at  $-20^\circ\text{C}$  until analysis. The supernatant samples were then analysed by HPLC (Agilent) in Rezex ROA-organic acid column (Phenomenex). The mobile phase used for separation of fermentation products was 0.005 N  $\text{H}_2\text{SO}_4$  at flow rate of 0.5 mL/min at ambient temperature. The separated compounds were detected using the UV detector at 210 nm. Lactate and succinate were identified on the basis of the retention time of known standards.

Two clones, one with increased fermentative activity and one with wild-type level, were chosen for whole genome re-sequencing as previously described (Maharjan *et al.* 2012).

### **Estimation of competitive fitness**

Fitness comparisons were made against a tetracycline-resistant derivative of BW6041 vs BW6043. Three to four chemostat competition experiments were conducted as previously described (Wang *et al.* 2010, Maharjan *et al.* 2010). The reported relative fitness was based on the equations given in Dykhuizen and Hartl (1983), measured in terms of Malthusian parameters, with the reported selection coefficient ( $S$ ) determined from the slope of the linear regression of  $\ln[p(t)/q(t)]$ , where  $p(t)$  and  $q(t)$  represent the relative frequencies of the strains from at a given time point. At least five different time points within 24 hours of competitions were used for estimating the selection coefficient.

**Figure S1.** Formate, lactate, and succinate are more closely correlated to each other than to acetate in the exometabolome of evolving cultures. (Ellipses represent 95% confidence intervals.)

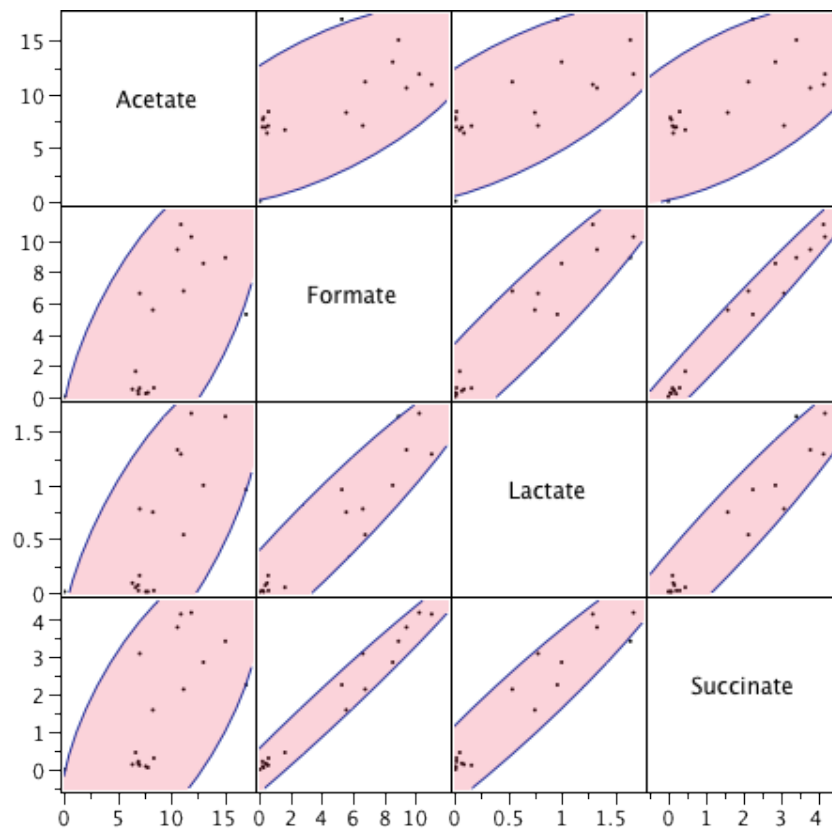

**Figure S2.** Glucose uptake and fermentation product production (both normalised by carbon atoms in the molecules) over time for chemostat 1.

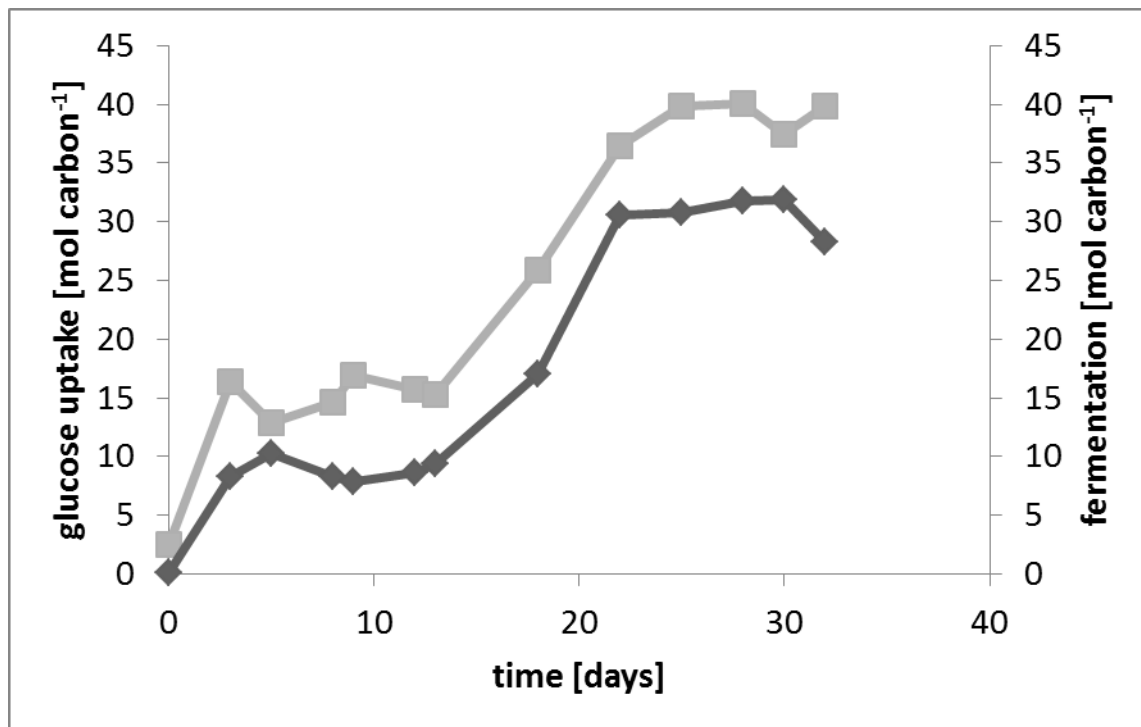

**Table S1.** Optical densities (OD<sub>600</sub>) of the chemostats.

| <b>Time (day)</b> | <b>1</b> | <b>2</b> |
|-------------------|----------|----------|
| <b>1</b>          | 0.318    | 0.298    |
| <b>2</b>          | 0.229    | 0.219    |
| <b>3</b>          | 0.157    | 0.157    |
| <b>4</b>          | 0.163    | 0.163    |
| <b>5</b>          | 0.147    | 0.147    |
| <b>7</b>          | 0.145    | 0.145    |
| <b>8</b>          | 0.141    | 0.141    |
| <b>9</b>          | 0.147    | 0.139    |
| <b>10</b>         | 0.149    | 0.149    |
| <b>12</b>         | 0.138    | 0.138    |
| <b>13</b>         | 0.103    | 0.143    |
| <b>14</b>         | 0.125    | 0.125    |
| <b>16</b>         | 0.129    | 0.129    |
| <b>17</b>         | #N/A     | 0.131    |
| <b>18</b>         | #N/A     | 0.111    |
| <b>19</b>         | 0.121    | #N/A     |
| <b>22</b>         | 0.099    | #N/A     |
| <b>23</b>         | 0.124    | 0.124    |
| <b>24</b>         | 0.131    | 0.131    |
| <b>25</b>         | #N/A     | 0.146    |
| <b>26</b>         | 0.141    | 0.131    |
| <b>27</b>         | #N/A     | 0.139    |
| <b>30</b>         | 0.126    | #N/A     |
| <b>32</b>         | #N/A     | 0.129    |

**Table S2.** Concentrations of glucose and fermentation products.

| Replicate | Day | glucose | acetate | ethanol | formate | lactate | propionate | succinate |
|-----------|-----|---------|---------|---------|---------|---------|------------|-----------|
|           |     | mM      | mM      | mM      | mM      | mM      | mM         | mM        |
| 1         | 0   | 10.68   | 0.03    | 0.01    | 0.06    | 0.01    | 0.00       | 0.00      |
| 1         | 3   | 8.38    | 3.83    | 0.01    | 0.12    | 0.01    | 0.01       | 0.11      |
| 1         | 5   | 8.96    | 4.62    | 0.01    | 0.33    | 0.01    | 0.01       | 0.16      |
| 1         | 8   | 8.67    | 3.81    | 0.01    | 0.22    | 0.04    | 0.01       | 0.09      |
| 1         | 9   | 8.28    | 3.52    | 0.02    | 0.28    | 0.05    | 0.01       | 0.07      |
| 1         | 12  | 8.48    | 3.89    | 0.01    | 0.32    | 0.09    | 0.01       | 0.06      |
| 1         | 13  | 8.56    | 3.69    | 0.02    | 0.91    | 0.03    | 0.01       | 0.25      |
| 1         | 18  | 6.79    | 4.57    | 0.03    | 3.07    | 0.41    | 0.01       | 0.87      |
| 1         | 22  | 5.02    | 6.57    | 0.02    | 5.40    | 0.92    | 0.01       | 2.29      |
| 1         | 25  | 4.47    | 6.55    | 0.01    | 5.64    | 0.92    | 0.01       | 2.30      |
| 1         | 28  | 4.42    | 8.30    | 0.02    | 4.91    | 0.90    | 0.01       | 1.88      |
| 1         | 30  | 4.86    | 8.03    | 0.02    | 5.56    | 0.80    | 0.02       | 1.94      |
| 1         | 32  | 4.46    | 9.36    | 0.02    | 2.92    | 0.53    | 0.02       | 1.24      |
| 2         | 0   | 11.46   | 0.04    | 0.01    | 0.00    | 0.01    | 0.00       | 0.00      |
| 2         | 2   | 7.66    |         |         |         |         |            |           |
| 2         | 6   | 8.55    | 4.21    | 0.02    | 0.13    | 0.01    | 0.00       | 0.04      |
| 2         | 8   | 8.88    |         |         |         |         |            |           |
| 2         | 10  | 8.85    | 4.32    | 0.01    | 0.16    | 0.00    | 0.01       | 0.03      |
| 2         | 13  | 8.8     |         |         |         |         |            |           |
| 2         | 19  | 5.76    | 3.90    | 0.01    | 3.65    | 0.43    | 0.01       | 1.70      |
| 2         | 23  | 5.03    | 5.09    | 0.03    | 4.98    | 0.55    | 0.01       | 1.88      |
| 2         | 26  | 4.97    | 6.01    | 0.01    | 6.08    | 0.71    | 0.01       | 2.27      |
| 2         | 29  | 6.46    | 6.15    | 0.01    | 3.73    | 0.30    | 0.01       | 1.17      |
| 2         | 30  | 6.26    | 6.32    | 0.02    | 3.85    | 0.30    | 0.01       | 1.20      |

**Table S3. List of strains used in this study**

| Strain | Isolate/Relevant genotype                                                                                                                                               | References                |
|--------|-------------------------------------------------------------------------------------------------------------------------------------------------------------------------|---------------------------|
| MC4100 | F <sup>-</sup> <i>araD139</i> $\Delta$ ( <i>argF-lac</i> ) <i>U169</i> <i>rspL150</i> <i>deoCl</i> <i>relA1</i> <i>thiA</i><br><i>ptsF25</i> <i>flb5301</i> <i>rbsR</i> |                           |
| BW2952 | MC4100 <i>malG::<math>\lambda</math>placMu55</i> $\phi$ ( <i>malG::lacZ</i> )                                                                                           | Ferenci et al.<br>(2009)  |
| BW3788 | BW2952 <i>sucC::Tn10</i>                                                                                                                                                | This study                |
| BW5318 | BW2952 <i>rpoS3767</i>                                                                                                                                                  | Maharjan et al.<br>(2013) |
| BW3789 | BW5318 <i>sucC::Tn10</i>                                                                                                                                                | This study                |
| BW6041 | A chemostat evolved isolate - isolated from a 19 <sup>th</sup> day<br>glycerol stock sample                                                                             | This study                |
| BW6042 | BW6041 <i>kanR::Tn10</i>                                                                                                                                                | This study                |
| BW6043 | A chemostat evolved isolate - isolated from a 19 <sup>th</sup> day<br>glycerol stock sample                                                                             | This study                |
| BW6044 | BW6043 <i>kanR::Tn10</i>                                                                                                                                                | This study                |
| DY330  | W3110 $\Delta$ <i>lacU169</i> <i>gal490</i> $\lambda$ <i>cl857</i> $\Delta$ ( <i>cro-bioA</i> )                                                                         | Yu et al. (2000)          |



**Table S4. List of mutations identified by whole genome re-sequencing in two evolved isolates**

| Isolate | Region    | Gene <sup>a</sup> | Product                                       | Genome position <sup>b</sup> | Nucleotide    |              | Codon     |              | Amino acid    |              |
|---------|-----------|-------------------|-----------------------------------------------|------------------------------|---------------|--------------|-----------|--------------|---------------|--------------|
|         |           |                   |                                               |                              | Referen<br>ce | change<br>to | Reference | change<br>to | Referen<br>ce | change<br>to |
| BW6041  | Noncoding | (7) <i>isrC</i>   | Small RNA with unkonwn function               | 1961815                      | G             | T            | NA        | NA           | NA            | NA           |
|         | Coding    | <i>rpoS</i>       | RNA polymerase, sigma S (sigma 38) factor     | 2751004                      | T             | C            | GAT       | GAC          | I             | V            |
|         | Coding    | <i>rpoS</i>       | RNA polymerase, sigma S (sigma 38) factor     | 2751045                      | A             | C            | CAG       | CCG          | L             | R            |
| BW6043  | Noncoding | (142) <i>sucC</i> | Intergene between <i>sucB</i> and <i>sucC</i> | 664852                       | A             | T            | NA        | NA           | NA            | NA           |
|         | Noncoding | (141) <i>sucC</i> | Intergene between <i>sucB</i> and <i>sucC</i> | 664853                       | A             | C            | NA        | NA           | NA            | NA           |
|         | Noncoding | (7b) <i>isrC</i>  | small RNA with unknown function               | 1961815                      | G             | T            | NA        | NA           | NA            | NA           |
|         | Coding    | <i>rpoS</i>       | RNA polymerase, sigma S (sigma 38) factor     | 2751004                      | T             | C            | GAT       | GAC          | I             | V            |
|         | Coding    | <i>rpoS</i>       | RNA polymerase, sigma S (sigma 38) factor     | 2751045                      | A             | C            | CAG       | CCG          | L             | R            |
|         | Noncoding | (164)BWG_3698     | Aminoglycoside phosphotransferase             | 4139083                      | C             | T            | NA        | NA           | NA            | NA           |

<sup>a</sup> Numbers in parentheses indicate the position of mutation relative to genes.

<sup>b</sup> Position of mutations in the genome is based on the genome sequence of the ancestral strain BW2952. Bold entries are shared mutations between these two strains.

NA stands for non-applicable

## References for supplementary material

- Beckonert, O. et al. Metabolic profiling, metabolomic and metabonomic procedures for NMR spectroscopy of urine, plasma, serum and tissue extracts. *Nature protocols* 2, 2692-2703 (2007).
- Behrends, V., Ebbels, T. M. D., Williams, H. D. & Bundy, J. G. Time-Resolved Metabolic Footprinting for Nonlinear Modeling of Bacterial Substrate Utilization. *Appl. Environ. Microbiol.* 75, 2453-2463, doi:10.1128/aem.01742-08 (2009).
- Dykhuizen, D. E. & Hartl, D. E. Selection in chemostats. *Microbiol. Rev.* 47, 150-168 (1983).
- Ferenci, T. et al. Genomic Sequencing Reveals Regulatory Mutations and Recombinational Events in the Widely Used MC4100 Lineage of *Escherichia coli* K-12. *J. Bacteriol.* 191, 4025-4029 (2009).
- Maharjan, R. et al. Genomic Identification of a Novel Mutation in *hfq* That Provides Multiple Benefits in Evolving Glucose-Limited Populations of *Escherichia coli*. *J. Bacteriol.* 192, 4517-4521 (2010).
- Maharjan, R. et al. The multiplicity of divergence mechanisms in a single evolving population. *Genome Biology* 13, R41 (2012).
- Maharjan, R. et al. The form of a trade-off determines the response to competition. *Ecol. Lett.* 16, 1267-1276 (2013).
- Ulrich, E. L. et al. BioMagResBank. *Nucleic Acids Res.* 36, D402-D408 (2008).
- Wang, L. et al. Divergence Involving Global Regulatory Gene Mutations in an *Escherichia coli* Population Evolving under Phosphate Limitation. *Genome Biology and Evolution* 2, 478-487 (2010).
- Yu, D. G. et al. An efficient recombination system for chromosome engineering in *Escherichia coli*. *Proc. Natl. Acad. Sci. USA* 97, 5978-5983 (2000).
